# Supplementary material for: Exogenously applied Casuarina equisetifolia leaf extracts act as an osmoprotectant on proline accumulation under drought stress in local rice from Indonesia
Source: Front Plant Sci. 2023 Aug 3;14:1210241. doi: 10.3389/fpls.2023.1210241 (PMC10437820; doi:10.3389/fpls.2023.1210241)
Supplement: Supplementary file 1 [file Table_1.xlsx]

## Sheet: Raw Data
	FTSW	CODE												CHL A				CHL B				CAR				ANTH				PRO				SOD				APX				CAT
			CHL A	CHL B	CAR	ANTH	PRO	SOD	APX	CAT	H2O2			1	2	3		1	2	3		1	2	3		1	2	3		1	2	3		1	2	3		1	2	3		1	2	3
	Kontrol	GJ-K-0	0.990925	0.0336122	0.00148254	3.3375	0.479911	0.00265291	2.6375	0.7875	0.362146		GJ-K-0	0.990925	1.24303	1.11698	GJ-K-0	0.0336122	0.0540907	0.0432467	GJ-K-0	0.00148254	0.00182679	0.00165503	GJ-K-0	3.3375	3.45	3.39375	GJ-K-0	0.479911	0.905098	0.692505	GJ-K-0	0.00265291	0.00198968	0.0023213	GJ-K-0	2.6375	2.5575	2.5975	GJ-K-0	0.7875	0.74875	0.768125
	Kontrol	KM-K-0	1.6067	0.0978868	0.00225157	2.75	0.554712	0.0153095	1.4225	0.6325	0.426502		KM-K-0	1.6067	1.89103	1.74886	KM-K-0	0.0978868	0.15558	0.125216	KM-K-0	0.00225157	0.00283895	0.0025512	KM-K-0	2.75	2.75	2.75	KM-K-0	0.554712	0.643293	0.599003	KM-K-0	0.0153095	0.0357038	0.0255066	KM-K-0	1.4225	1.9125	1.6675	KM-K-0	0.6325	0.925	0.77875
	Kontrol	BSM-K-0	1.19492	0.0495428	0.00176693	2.1	1.33619	0.0588062	1.54	0.4675	0.256837		BSM-K-0	1.19492	1.30158	1.24825	BSM-K-0	0.0495428	0.0572037	0.0533069	BSM-K-0	0.00176693	0.00176479	0.00176515	BSM-K-0	2.1	3.95	3.025	BSM-K-0	1.33619	1.83027	1.58323	BSM-K-0	0.0588062	0.0739499	0.0719049	BSM-K-0	1.54	1.47	1.505	BSM-K-0	0.4675	0.78375	0.625625
	Kontrol	CH-K-0	1.66795	0.105934	0.00226116	2.3625	0.501564	0.0146463	2.6025	0.81375	5.5574		CH-K-0	1.66795	1.48129	1.57462	CH-K-0	0.105934	0.0796167	0.0923197	CH-K-0	0.00226116	0.00187129	0.00206567	CH-K-0	2.3625	3.5625	2.9625	CH-K-0	0.501564	0.300781	0.401172	CH-K-0	0.0146463	0.00878777	0.011717	CH-K-0	2.6025	2.525	2.56375	CH-K-0	0.81375	0.6725	0.743125
	Kontrol	SB-K-0	1.41986	0.0754826	0.00198836	3.175	0.857855	0.0221629	2.4625	0.4525	1.94178		SB-K-0	1.41986	1.78141	1.60063	SB-K-0	0.0754826	0.134258	0.102863	SB-K-0	0.00198836	0.00241797	0.00221339	SB-K-0	3.175	6.1125	4.64375	SB-K-0	0.857855	0.662978	0.760416	SB-K-0	0.0221629	0.026916	0.0245394	SB-K-0	2.4625	2.1675	2.315	SB-K-0	0.4525	0.49	0.47125
	Kontrol	GJ-K-0	1.24303	0.0540907	0.00182679	3.45	0.905098	0.00198968	2.5575	0.74875	0.490857		GJ-K-50	0.983405	0.999504	0.991454	GJ-K-50	0.032018	0.0337927	0.0329003	GJ-K-50	0.00171297	0.0015261	0.00162087	GJ-K-50	4.1875	4.01875	3.85	GJ-K-50	0.548807	0.822423	0.685615	GJ-K-50	0.0243736	0.0364223	0.00403464	GJ-K-50	3.2725	3.9525	3.6125	GJ-K-50	0.295	0.56625	0.430625
	Kontrol	KM-K-0	1.89103	0.15558	0.00283895	2.75	0.643293	0.0357038	1.9125	0.925	0.806785		KM-K-50	1.66525	1.6058	1.63553	KM-K-50	0.0990956	0.0910411	0.0950266	KM-K-50	0.00240984	0.0023573	0.00238376	KM-K-50	5.3375	4.2625	3.1875	KM-K-50	0.645261	1.27714	0.961199	KM-K-50	0.0395173	0.0371408	0.0104735	KM-K-50	2.53	3.805	3.1675	KM-K-50	0.93	0.55625	0.743125
	Kontrol	BSM-K-0	1.30158	0.0572037	0.00176479	3.95	1.83027	0.0739499	1.47	0.78375	0.672223		BSM-K-50	1.51712	1.41415	1.43918	BSM-K-50	0.0846531	0.0729341	0.0790186	BSM-K-50	0.00224505	0.00231421	0.00235147	BSM-K-50	5.7	4.55	5.125	BSM-K-50	1.22399	0.946436	1.08521	BSM-K-50	0.00657701	0.00348195	0.00502948	BSM-K-50	1.9025	1.62	1.76125	BSM-K-50	0.91125	0.86875	0.89
	Kontrol	CH-K-0	1.48129	0.0796167	0.00187129	3.5625	0.300781	0.00878777	2.525	0.6725	1.91253		CH-K-50	1.28926	1.46308	1.37617	CH-K-50	0.0606974	0.081115	0.0705428	CH-K-50	0.00196175	0.00275765	0.00235589	CH-K-50	9.25	4.6375	6.94375	CH-K-50	0.39133	0.371645	0.381488	CH-K-50	0.0264186	0.010059	0.00287399	CH-K-50	3.9875	2.8025	3.395	CH-K-50	0.4325	0.87125	0.651875
	Kontrol	SB-K-0	1.78141	0.134258	0.00241797	6.1125	0.662978	0.026916	2.1675	0.49	1.25142		SB-K-50	1.93195	2.4307	2.18133	SB-K-50	0.172905	0.217744	0.195314	SB-K-50	0.0029844	0.00334024	0.00318241	SB-K-50	5.3875	4.325	4.85625	SB-K-50	0.584239	0.714158	0.649198	SB-K-50	0.0307848	0.0365328	0.0024871	SB-K-50	4.7175	4.31	4.51375	SB-K-50	1.0075	0.51375	0.760625
	Kontrol	GJ-K-0	1.11698	0.0432467	0.00165503	3.39375	0.692505	0.0023213	2.5975	0.768125	0.426502		GJ-K-100	0.905357	1.0218	0.963578	GJ-K-100	0.0253864	0.0345151	0.0297837	GJ-K-100	0.00129497	0.00160709	0.00145033	GJ-K-100	2.4875	3.075	2.78125	GJ-K-100	0.788959	1.41887	1.10391	GJ-K-100	0.0417833	0.0103353	0.0260593	GJ-K-100	3.515	2.7225	3.11875	GJ-K-100	0.7225	0.83125	0.776875
	Kontrol	KM-K-0	1.74886	0.125216	0.0025512	2.75	0.599003	0.0255066	1.6675	0.77875	0.616643		KM-K-100	1.0414	1.54805	1.29473	KM-K-100	0.0348298	0.084173	0.0568506	KM-K-100	0.00148288	0.00207282	0.00178367	KM-K-100	3.1375	4.175	3.65625	KM-K-100	0.560618	0.664946	0.612782	KM-K-100	0.0365881	0.025479	0.0310335	KM-K-100	2.67	2.0125	2.34125	KM-K-100	0.3625	0.70125	0.531875
	Kontrol	BSM-K-0	1.24825	0.0533069	0.00176515	3.025	1.58323	0.0719049	1.505	0.625625	0.46453		BSM-K-100	1.13799	1.26901	1.2035	BSM-K-100	0.0444975	0.0529798	0.048652	BSM-K-100	0.00146655	0.0014349	0.00144935	BSM-K-100	2.7625	2.1	2.43125	BSM-K-100	0.556681	0.67282	0.61475	BSM-K-100	0.026087	0.0270818	0.0265844	BSM-K-100	2.845	1.79	2.3175	BSM-K-100	0.78	0.79375	0.786875
	Kontrol	CH-K-0	1.57462	0.0923197	0.00206567	2.9625	0.401172	0.011717	2.56375	0.743125	3.73496		CH-K-100	1.12339	1.48103	1.30221	CH-K-100	0.043243	0.0735068	0.057379	CH-K-100	0.00145195	0.00173629	0.00159346	CH-K-100	3.5125	4.475	3.99375	CH-K-100	0.446447	0.348024	0.397235	CH-K-100	0.0438836	0.0248158	0.0343497	CH-K-100	3.4075	2.555	2.98125	CH-K-100	0.7275	0.8375	0.7825
	Kontrol	SB-K-0	1.60063	0.102863	0.00221339	4.64375	0.760416	0.0245394	2.315	0.47125	1.5966		SB-K-100	1.35088	2.27835	1.81462	SB-K-100	0.0616865	0.176629	0.11177	SB-K-100	0.00174001	0.00286902	0.00230462	SB-K-100	5.55	4.675	5.1125	SB-K-100	0.536996	0.527154	0.532075	SB-K-100	0.00364775	0.00585851	0.00475313	SB-K-100	4.0775	4.08	4.07875	SB-K-100	0.87	0.55375	0.711875
	Kontrol	GJ-K-50	0.983405	0.032018	0.00171297	4.1875	0.548807	0.0243736	3.2725	0.295	0.344595		GJ-S-0	0.361523	0.417702	0.389612	GJ-S-0	0.00468273	0.00587525	0.00526336	GJ-S-0	0.000592974	0.000671787	0.000632794	GJ-S-0	3.7875	2.65	3.21875	GJ-S-0	0.767306	0.680694	0.724	GJ-S-0	0.0171887	0.0242631	0.0207259	GJ-S-0	2.5325	3.5925	3.0625	GJ-S-0	0.43375	0.5225	0.478125
	Kontrol	KM-K-50	1.66525	0.0990956	0.00240984	5.3375	0.645261	0.0395173	2.53	0.93	0.385548		KM-S-0	0.598903	0.323309	0.461106	KM-S-0	0.0124611	0.00314618	0.00704055	KM-S-0	0.000955142	0.000449288	0.000702343	KM-S-0	3.45	3.9375	3.69375	KM-S-0	0.747621	0.536996	0.642309	KM-S-0	0.0333825	0.0454864	0.0394344	KM-S-0	1.88	1.2575	1.56875	KM-S-0	0.42625	0.535	0.480625
	Kontrol	BSM-K-50	1.51712	0.0846531	0.00224505	5.7	1.22399	0.00657701	1.9025	0.91125	0.385548		BSM-S-0	0.281104	0.184024	0.232564	BSM-S-0	0.00308197	0.00150469	0.00222568	BSM-S-0	0.000395838	0.000413381	0.000400246	BSM-S-0	2.225	1.5	2.95	BSM-S-0	0.87754	1.598	1.23777	BSM-S-0	0.0040899	0.0118276	0.00795873	BSM-S-0	1.5175	2.1675	1.8425	BSM-S-0	0.8275	0.7775	0.8025
	Kontrol	CH-K-50	1.28926	0.0606974	0.00196175	9.25	0.39133	0.0264186	3.9875	0.4325	2.02369		CH-S-0	0.423025	0.687591	0.555308	CH-S-0	0.00596681	0.016195	0.010456	CH-S-0	0.000643248	0.00109142	0.000867245	CH-S-0	8.8125	4.75	6.78125	CH-S-0	0.546838	0.4681	0.507469	CH-S-0	0.023213	0.00403464	0.0136238	CH-S-0	1.9025	1.825	1.86375	CH-S-0	0.60125	0.9025	0.751875
	Kontrol	SB-K-50	1.93195	0.172905	0.0029844	5.3875	0.584239	0.0307848	4.7175	1.0075	0.736579		SB-S-0	0.239195	0.229744	0.23447	SB-S-0	0.00182452	0.00208138	0.00195633	SB-S-0	0.000359002	0.000444872	0.000401035	SB-S-0	7.13125	7.175	7.0875	SB-S-0	0.867698	0.810612	0.839155	SB-S-0	0.00259764	0.00397937	0.0032885	SB-S-0	3.09	3.7975	3.44375	SB-S-0	0.5675	0.90375	0.735625
	Kontrol	GJ-K-50	0.999504	0.0337927	0.0015261	4.01875	0.822423	0.0364223	3.9525	0.56625	1.43279		GJ-S-50	0.272583	0.256173	0.264378	GJ-S-50	0.00266874	0.00241002	0.00253781	GJ-S-50	0.000576467	0.000563688	0.000570022	GJ-S-50	6.0125	6.075	6.04375	GJ-S-50	0.590145	0.722031	0.656088	GJ-S-50	0.0755527	0.0664609	0.0573692	GJ-S-50	2.505	3.005	2.755	GJ-S-50	0.89875	0.885	0.891875
	Kontrol	KM-K-50	1.6058	0.0910411	0.0023573	4.2625	1.27714	0.0371408	3.805	0.55625	0.4031		KM-S-50	0.265689	0.190284	0.227987	KM-S-50	0.00226961	0.00141974	0.00182429	KM-S-50	0.000428706	0.000327358	0.000380502	KM-S-50	3.3	4.7125	4.00625	KM-S-50	0.556681	0.507469	0.532075	KM-S-50	0.0526713	0.0668202	0.0597458	KM-S-50	1.605	2.16	1.8825	KM-S-50	0.6475	0.37625	0.511875
	Kontrol	BSM-K-50	1.41415	0.0729341	0.00231421	4.55	0.946436	0.00348195	1.62	0.86875	0.321193		BSM-S-50	0.392339	0.274398	0.333368	BSM-S-50	0.00553015	0.00262451	0.00394374	BSM-S-50	0.000530791	0.000406626	0.000469128	BSM-S-50	8.0875	5.675	6.88125	BSM-S-50	0.794864	0.920846	0.857855	BSM-S-50	0.00171334	0.0213338	0.067594	BSM-S-50	2.5225	3.2025	2.8625	BSM-S-50	0.92	0.83125	0.875625
	Kontrol	CH-K-50	1.46308	0.081115	0.00275765	4.6375	0.371645	0.010059	2.8025	0.87125	1.74287		CH-S-50	0.789619	0.504833	0.647226	CH-S-50	0.0210686	0.00974532	0.0148817	CH-S-50	0.0012349	0.000935174	0.00108356	CH-S-50	6.1125	7.725	6.91875	CH-S-50	0.59605	0.509438	0.552744	CH-S-50	0.0208917	0.0281319	0.0245118	CH-S-50	1.44	1.88	1.66	CH-S-50	0.72625	0.6275	0.676875
	Kontrol	SB-K-50	2.4307	0.217744	0.00334024	4.325	0.714158	0.0365328	4.31	0.51375	1.35673		SB-S-50	0.305525	0.570615	0.58907	SB-S-50	0.0136827	0.024881	0.0121879	SB-S-50	0.0039921	0.00290662	0.00102217	SB-S-50	7.71875	7.025	8.4125	SB-S-50	0.574397	0.682662	0.62853	SB-S-50	0.010059	0.00425571	0.00715733	SB-S-50	2.355	2.1975	2.27625	SB-S-50	0.88125	0.6975	0.789375
	Kontrol	GJ-K-50	0.991454	0.0329003	0.00162087	3.85	0.685615	0.00403464	3.6125	0.430625	0.888692		GJ-S-100	0.389205	0.517108	0.145937	GJ-S-100	0.00526516	0.00998428	0.00239599	GJ-S-100	0.000778961	0.000998465	0.00283119	GJ-S-100	6.8875	8.275	7.58125	GJ-S-100	0.973994	0.973994	0.973994	GJ-S-100	0.0228261	0.0139278	0.00323324	GJ-S-100	3.1225	1.625	2.37375	GJ-S-100	0.8025	0.85125	0.826875
	Kontrol	KM-K-50	1.63553	0.0950266	0.00238376	3.1875	0.961199	0.0104735	3.1675	0.743125	0.394324		KM-S-100	0.894181	0.588463	0.283521	KM-S-100	0.0336795	0.0153749	0.00904324	KM-S-100	0.00189661	0.0012515	0.00421718	KM-S-100	7.4125	6.6	7.00625	KM-S-100	1.10194	1.39328	1.24761	KM-S-100	0.0310059	0.0332719	0.00563744	KM-S-100	2.7	2.5325	2.61625	KM-S-100	0.65125	0.53375	0.5925
	Kontrol	BSM-K-50	1.43918	0.0790186	0.00235147	5.125	1.08521	0.00502948	1.76125	0.89	0.353371		BSM-S-100	0.845303	0.838894	0.389027	BSM-S-100	0.0395175	0.0342114	0.0170259	BSM-S-100	0.00162267	0.00166061	0.00366976	BSM-S-100	5.65	8.325	6.9875	BSM-S-100	2.02712	2.48971	2.25842	BSM-S-100	0.00591378	0.00442152	0.00516765	BSM-S-100	2.1325	3.93	3.03125	BSM-S-100	0.38	0.86	0.62
	Kontrol	CH-K-50	1.37617	0.0705428	0.00235589	6.94375	0.381488	0.00287399	3.395	0.651875	1.88328		CH-S-100	0.69241	0.281524	0.241926	CH-S-100	0.0157606	0.00891627	0.00658442	CH-S-100	0.00125689	0.00511019	0.00475872	CH-S-100	7.8125	9.1125	8.4625	CH-S-100	0.714158	0.785022	0.74959	CH-S-100	0.0313375	0.0876013	0.0024871	CH-S-100	1.7525	3.0425	2.3975	CH-S-100	0.79375	0.93125	0.8625
	Kontrol	SB-K-50	2.18133	0.195314	0.00318241	4.85625	0.649198	0.0024871	4.51375	0.760625	1.04666		SB-S-100	1.33036	0.235341	0.350129	SB-S-100	0.0695819	0.00623087	0.0137914	SB-S-100	0.0023808	0.00417764	0.00558866	SB-S-100	8.1125	12.5375	10.325	SB-S-100	1.06848	0.885414	0.976947	SB-S-100	0.00607959	0.0200626	0.00262528	SB-S-100	1.62	1.8375	1.72875	SB-S-100	0.9375	0.2	0.56875
	Kontrol	GJ-K-100	0.905357	0.0253864	0.00129497	2.4875	0.788959	0.0417833	3.515	0.7225	0.239286
	Kontrol	KM-K-100	1.0414	0.0348298	0.00148288	3.1375	0.560618	0.0365881	2.67	0.3625	0.332894
	Kontrol	BSM-K-100	1.13799	0.0444975	0.00146655	2.7625	0.556681	0.026087	2.845	0.78	0.198332
	Kontrol	CH-K-100	1.12339	0.043243	0.00145195	3.5125	0.446447	0.0438836	3.4075	0.7275	1.27483
	Kontrol	SB-K-100	1.35088	0.0616865	0.00174001	5.55	0.536996	0.00364775	4.0775	0.87	1.09931
	Kontrol	GJ-K-100	1.0218	0.0345151	0.00160709	3.075	1.41887	0.0103353	2.7225	0.83125	0.414801
	Kontrol	KM-K-100	1.54805	0.084173	0.00207282	4.175	0.664946	0.025479	2.0125	0.70125	0.151528
	Kontrol	BSM-K-100	1.26901	0.0529798	0.0014349	2.1	0.67282	0.0270818	1.79	0.79375	0.438203
	Kontrol	CH-K-100	1.48103	0.0735068	0.00173629	4.475	0.348024	0.0248158	2.555	0.8375	0.742429
	Kontrol	SB-K-100	2.27835	0.176629	0.00286902	4.675	0.527154	0.00585851	4.08	0.55375	1.05836
	Kontrol	GJ-K-100	0.963578	0.0297837	0.00145033	2.78125	1.10391	0.0260593	3.11875	0.776875	0.327043
	Kontrol	KM-K-100	1.29473	0.0568506	0.00178367	3.65625	0.612782	0.0310335	2.34125	0.531875	0.242211
	Kontrol	BSM-K-100	1.2035	0.048652	0.00144935	2.43125	0.61475	0.0265844	2.3175	0.786875	0.318268
	Kontrol	CH-K-100	1.30221	0.057379	0.00159346	3.99375	0.397235	0.0343497	2.98125	0.7825	1.00863
	Kontrol	SB-K-100	1.81462	0.11177	0.00230462	5.1125	0.532075	0.00475313	4.07875	0.711875	1.07883
	Stress	GJ-S-0	0.361523	0.00468273	0.000592974	3.7875	0.767306	0.0171887	2.5325	0.43375	0.52011
	Stress	KM-S-0	0.598903	0.0124611	0.000955142	3.45	0.747621	0.0333825	1.88	0.42625	0.830187
	Stress	BSM-S-0	0.281104	0.00308197	0.000395838	2.225	0.87754	0.0040899	1.5175	0.8275	0.139827
	Stress	CH-S-0	0.423025	0.00596681	0.000643248	8.8125	0.546838	0.023213	1.9025	0.60125	1.77212
	Stress	SB-S-0	0.239195	0.00182452	0.000359002	7.13125	0.867698	0.00259764	3.09	0.5675	8.59966
	Stress	GJ-S-0	0.417702	0.00587525	0.000671787	2.65	0.680694	0.0242631	3.5925	0.5225	0.397249
	Stress	KM-S-0	0.323309	0.00314618	0.000449288	3.9375	0.536996	0.0454864	1.2575	0.535	0.227585
	Stress	BSM-S-0	0.184024	0.00150469	0.000413381	1.5	1.598	0.0118276	2.1675	0.7775	0.29194
	Stress	CH-S-0	0.687591	0.016195	0.00109142	4.75	0.4681	0.00403464	1.825	0.9025	1.64926
	Stress	SB-S-0	0.229744	0.00208138	0.000444872	7.175	0.810612	0.00397937	3.7975	0.90375	3.3342
	Stress	GJ-S-0	0.389612	0.00526336	0.000632794	3.21875	0.724	0.0207259	3.0625	0.478125	0.166154
	Stress	KM-S-0	0.461106	0.00704055	0.000702343	3.69375	0.642309	0.0394344	1.56875	0.480625	0.528886
	Stress	BSM-S-0	0.232564	0.00222568	0.000400246	2.95	1.23777	0.00795873	1.8425	0.8025	0.215884
	Stress	CH-S-0	0.555308	0.010456	0.000867245	6.78125	0.507469	0.0136238	1.86375	0.751875	1.71069
	Stress	SB-S-0	0.23447	0.00195633	0.000401035	7.0875	0.839155	0.0032885	3.44375	0.735625	5.96693
	Stress	GJ-S-50	0.272583	0.00266874	0.000576467	6.0125	0.590145	0.0755527	2.505	0.89875	0.941346
	Stress	KM-S-50	0.265689	0.00226961	0.000428706	3.3	0.556681	0.0526713	1.605	0.6475	0.210033
	Stress	BSM-S-50	0.392339	0.00553015	0.000530791	8.0875	0.794864	0.00171334	2.5225	0.92	0.245136
	Stress	CH-S-50	0.789619	0.0210686	0.0012349	6.1125	0.59605	0.0208917	1.44	0.72625	2.7199
	Stress	SB-S-50	0.305525	0.0136827	0.0039921	7.71875	0.574397	0.010059	2.355	0.88125	2.37472
	Stress	GJ-S-50	0.256173	0.00241002	0.000563688	6.075	0.722031	0.0664609	3.005	0.885	0.806785
	Stress	KM-S-50	0.190284	0.00141974	0.000327358	4.7125	0.507469	0.0668202	2.16	0.37625	0.473306
	Stress	BSM-S-50	0.274398	0.00262451	0.000406626	5.675	0.920846	0.0213338	3.2025	0.83125	0.52011
	Stress	CH-S-50	0.504833	0.00974532	0.000935174	7.725	0.509438	0.0281319	1.88	0.6275	4.4926
	Stress	SB-S-50	0.570615	0.024881	0.00290662	7.025	0.682662	0.00425571	2.1975	0.6975	1.0291
	Stress	GJ-S-50	0.264378	0.00253781	0.000570022	6.04375	0.656088	0.0573692	2.755	0.891875	0.874066
	Stress	KM-S-50	0.227987	0.00182429	0.000380502	4.00625	0.532075	0.0597458	1.8825	0.511875	0.34167
	Stress	BSM-S-50	0.333368	0.00394374	0.000469128	6.88125	0.857855	0.067594	2.8625	0.875625	0.382623
	Stress	CH-S-50	0.647226	0.0148817	0.00108356	6.91875	0.552744	0.0245118	1.66	0.676875	3.60625
	Stress	SB-S-50	0.58907	0.0121879	0.00102217	8.4125	0.62853	0.00715733	2.27625	0.789375	1.70191
	Stress	GJ-S-100	0.389205	0.00526516	0.000778961	6.8875	0.973994	0.0228261	3.1225	0.8025	1.71946
	Stress	KM-S-100	0.894181	0.0336795	0.00189661	7.4125	1.10194	0.0310059	2.7	0.65125	1.0174
	Stress	BSM-S-100	0.845303	0.0395175	0.00162267	5.65	2.02712	0.00591378	2.1325	0.38	14.456
	Stress	CH-S-100	0.69241	0.0157606	0.00125689	7.8125	0.714158	0.0313375	1.7525	0.79375	4.36974
	Stress	SB-S-100	1.33036	0.0695819	0.0023808	8.1125	1.06848	0.00607959	1.62	0.9375	4.93724
	Stress	GJ-S-100	0.517108	0.00998428	0.000998465	8.275	0.973994	0.0139278	1.625	0.85125	2.28111
	Stress	KM-S-100	0.588463	0.0153749	0.0012515	6.6	1.39328	0.0332719	2.5325	0.53375	2.65554
	Stress	BSM-S-100	0.838894	0.0342114	0.00166061	8.325	2.48971	0.00442152	3.93	0.86	11.9637
	Stress	CH-S-100	0.281524	0.00891627	0.00511019	9.1125	0.785022	0.0876013	3.0425	0.93125	7.73963
	Stress	SB-S-100	0.235341	0.00623087	0.00417764	12.5375	0.885414	0.0200626	1.8375	0.2	6.96152
	Stress	GJ-S-100	0.145937	0.00239599	0.00283119	7.58125	0.973994	0.00323324	2.37375	0.826875	2.00029
	Stress	KM-S-100	0.283521	0.00904324	0.00421718	7.00625	1.24761	0.00563744	2.61625	0.5925	1.83647
	Stress	BSM-S-100	0.389027	0.0170259	0.00366976	6.9875	2.25842	0.00516765	3.03125	0.62	13.2099
	Stress	CH-S-100	0.241926	0.00658442	0.00475872	8.4625	0.74959	0.0024871	2.3975	0.8625	6.05469
	Stress	SB-S-100	0.350129	0.0137914	0.00558866	10.325	0.976947	0.00262528	1.72875	0.56875	5.94938

## Sheet: GraphPP-Data
	FTSW	CODE	Physiological Changes											CHL A							CHL B							CAR							ANTH							PRO							SOD
		Code	CHL A	CHL B	CAR	ANTH	PRO	SOD	APX	CAT	H2O2			FTSW 1	FTSW 1	FTSW 1	FTSW 0.2	FTSW 0.2	FTSW 0.2		FTSW 1	FTSW 1	FTSW 1	FTSW 0.2	FTSW 0.2	FTSW 0.2		FTSW 1	FTSW 1	FTSW 1	FTSW 0.2	FTSW 0.2	FTSW 0.2		FTSW 1	FTSW 1	FTSW 1	FTSW 0.2	FTSW 0.2	FTSW 0.2		FTSW 1	FTSW 1	FTSW 1	FTSW 0.2	FTSW 0.2	FTSW 0.2		FTSW 1
	Kontrol	GJ-K-0	0.990925	0.0336122	0.00148254	3.3375	0.479911	0.00265291	2.6375	0.7875	0.362146		GJ-0	0.990925	1.24303	1.11698	0.361523	0.417702	0.389612	GJ-0	0.0336122	0.0540907	0.0432467	0.00468273	0.00587525	0.00526336	GJ-0	0.00148254	0.00182679	0.00165503	0.000592974	0.000671787	0.000632794	GJ-0	3.3375	3.45	3.39375	3.7875	2.65	3.21875	GJ-0	0.479911	0.905098	0.692505	0.767306	0.680694	0.724	GJ-0	0.00265291
	Kontrol	KM-K-0	1.6067	0.0978868	0.00225157	2.75	0.554712	0.0153095	1.4225	0.6325	0.426502		KM-0	1.6067	1.89103	1.74886	0.598903	0.323309	0.461106	KM-0	0.0978868	0.15558	0.125216	0.0124611	0.00314618	0.00704055	KM-0	0.00225157	0.00283895	0.0025512	0.000955142	0.000449288	0.000702343	KM-0	2.75	2.75	2.75	3.45	3.9375	3.69375	KM-0	0.554712	0.643293	0.599003	0.747621	0.536996	0.642309	KM-0	0.0153095
	Kontrol	BSM-K-0	1.19492	0.0495428	0.00176693	2.1	1.33619	0.0588062	1.54	0.4675	0.256837		BSM-0	1.19492	1.30158	1.24825	0.281104	0.184024	0.232564	BSM-0	0.0495428	0.0572037	0.0533069	0.00308197	0.00150469	0.00222568	BSM-0	0.00176693	0.00176479	0.00176515	0.000395838	0.000413381	0.000400246	BSM-0	2.1	3.95	3.025	2.225	1.5	2.95	BSM-0	1.33619	1.83027	1.58323	0.87754	1.598	1.23777	BSM-0	0.0588062
	Kontrol	CH-K-0	1.66795	0.105934	0.00226116	2.3625	0.501564	0.0146463	2.6025	0.81375	5.5574		CH-0	1.66795	1.48129	1.57462	0.423025	0.687591	0.555308	CH-0	0.105934	0.0796167	0.0923197	0.00596681	0.016195	0.010456	CH-0	0.00226116	0.00187129	0.00206567	0.000643248	0.00109142	0.000867245	CH-0	2.3625	3.5625	2.9625	8.8125	4.75	6.78125	CH-0	0.501564	0.300781	0.401172	0.546838	0.4681	0.507469	CH-0	0.0146463
	Kontrol	SB-K-0	1.41986	0.0754826	0.00198836	3.175	0.857855	0.0221629	2.4625	0.4525	1.94178		SB-0	1.41986	1.78141	1.60063	0.239195	0.229744	0.23447	SB-0	0.0754826	0.134258	0.102863	0.00182452	0.00208138	0.00195633	SB-0	0.00198836	0.00241797	0.00221339	0.000359002	0.000444872	0.000401035	SB-0	3.175	6.1125	4.64375	7.13125	7.175	7.0875	SB-0	0.857855	0.662978	0.760416	0.867698	0.810612	0.839155	SB-0	0.0221629
	Kontrol	GJ-K-0	1.24303	0.0540907	0.00182679	3.45	0.905098	0.00198968	2.5575	0.74875	0.490857		GJ-50	0.983405	0.999504	0.991454	0.272583	0.256173	0.264378	GJ-50	0.032018	0.0337927	0.0329003	0.00266874	0.00241002	0.00253781	GJ-50	0.00171297	0.0015261	0.00162087	0.000576467	0.000563688	0.000570022	GJ-50	4.1875	4.01875	3.85	6.0125	6.075	6.04375	GJ-50	0.548807	0.822423	0.685615	0.590145	0.722031	0.656088	GJ-50	0.0243736
	Kontrol	KM-K-0	1.89103	0.15558	0.00283895	2.75	0.643293	0.0357038	1.9125	0.925	0.806785		KM-50	1.66525	1.6058	1.63553	0.265689	0.190284	0.227987	KM-50	0.0990956	0.0910411	0.0950266	0.00226961	0.00141974	0.00182429	KM-50	0.00240984	0.0023573	0.00238376	0.000428706	0.000327358	0.000380502	KM-50	5.3375	4.2625	3.1875	3.3	4.7125	4.00625	KM-50	0.645261	1.27714	0.961199	0.556681	0.507469	0.532075	KM-50	0.0395173
	Kontrol	BSM-K-0	1.30158	0.0572037	0.00176479	3.95	1.83027	0.0739499	1.47	0.78375	0.672223		BSM-50	1.51712	1.41415	1.43918	0.392339	0.274398	0.333368	BSM-50	0.0846531	0.0729341	0.0790186	0.00553015	0.00262451	0.00394374	BSM-50	0.00224505	0.00231421	0.00235147	0.000530791	0.000406626	0.000469128	BSM-50	5.7	4.55	5.125	8.0875	5.675	6.88125	BSM-50	1.22399	0.946436	1.08521	0.794864	0.920846	0.857855	BSM-50	0.00657701
	Kontrol	CH-K-0	1.48129	0.0796167	0.00187129	3.5625	0.300781	0.00878777	2.525	0.6725	1.91253		CH-50	1.28926	1.46308	1.37617	0.789619	0.504833	0.647226	CH-50	0.0606974	0.081115	0.0705428	0.0210686	0.00974532	0.0148817	CH-50	0.00196175	0.00275765	0.00235589	0.0012349	0.000935174	0.00108356	CH-50	9.25	4.6375	6.94375	6.1125	7.725	6.91875	CH-50	0.39133	0.371645	0.381488	0.59605	0.509438	0.552744	CH-50	0.0264186
	Kontrol	SB-K-0	1.78141	0.134258	0.00241797	6.1125	0.662978	0.026916	2.1675	0.49	1.25142		SB-50	1.93195	2.4307	2.18133	0.305525	0.570615	0.58907	SB-50	0.172905	0.217744	0.195314	0.0136827	0.024881	0.0121879	SB-50	0.0029844	0.00334024	0.00318241	0.0039921	0.00290662	0.00102217	SB-50	5.3875	4.325	4.85625	7.71875	7.025	8.4125	SB-50	0.584239	0.714158	0.649198	0.574397	0.682662	0.62853	SB-50	0.0307848
	Kontrol	GJ-K-0	1.11698	0.0432467	0.00165503	3.39375	0.692505	0.0023213	2.5975	0.768125	0.426502		GJ-100	0.905357	1.0218	0.963578	0.389205	0.517108	0.145937	GJ-100	0.0253864	0.0345151	0.0297837	0.00526516	0.00998428	0.00239599	GJ-100	0.00129497	0.00160709	0.00145033	0.000778961	0.000998465	0.00283119	GJ-100	2.4875	3.075	2.78125	6.8875	8.275	7.58125	GJ-100	0.788959	1.41887	1.10391	0.973994	0.973994	0.973994	GJ-100	0.0417833
	Kontrol	KM-K-0	1.74886	0.125216	0.0025512	2.75	0.599003	0.0255066	1.6675	0.77875	0.616643		KM-100	1.0414	1.54805	1.29473	0.894181	0.588463	0.283521	KM-100	0.0348298	0.084173	0.0568506	0.0336795	0.0153749	0.00904324	KM-100	0.00148288	0.00207282	0.00178367	0.00189661	0.0012515	0.00421718	KM-100	3.1375	4.175	3.65625	7.4125	6.6	7.00625	KM-100	0.560618	0.664946	0.612782	1.10194	1.39328	1.24761	KM-100	0.0365881
	Kontrol	BSM-K-0	1.24825	0.0533069	0.00176515	3.025	1.58323	0.0719049	1.505	0.625625	0.46453		BSM-100	1.13799	1.26901	1.2035	0.845303	0.838894	0.389027	BSM-100	0.0444975	0.0529798	0.048652	0.0395175	0.0342114	0.0170259	BSM-100	0.00146655	0.0014349	0.00144935	0.00162267	0.00166061	0.00366976	BSM-100	2.7625	2.1	2.43125	5.65	8.325	6.9875	BSM-100	0.556681	0.67282	0.61475	2.02712	2.48971	2.25842	BSM-100	0.026087
	Kontrol	CH-K-0	1.57462	0.0923197	0.00206567	2.9625	0.401172	0.011717	2.56375	0.743125	3.73496		CH-100	1.12339	1.48103	1.30221	0.69241	0.281524	0.241926	CH-100	0.043243	0.0735068	0.057379	0.0157606	0.00891627	0.00658442	CH-100	0.00145195	0.00173629	0.00159346	0.00125689	0.00511019	0.00475872	CH-100	3.5125	4.475	3.99375	7.8125	9.1125	8.4625	CH-100	0.446447	0.348024	0.397235	0.714158	0.785022	0.74959	CH-100	0.0438836
	Kontrol	SB-K-0	1.60063	0.102863	0.00221339	4.64375	0.760416	0.0245394	2.315	0.47125	1.5966		SB-100	1.35088	2.27835	1.81462	1.33036	0.235341	0.350129	SB-100	0.0616865	0.176629	0.11177	0.0695819	0.00623087	0.0137914	SB-100	0.00174001	0.00286902	0.00230462	0.0023808	0.00417764	0.00558866	SB-100	5.55	4.675	5.1125	8.1125	12.5375	10.325	SB-100	0.536996	0.527154	0.532075	1.06848	0.885414	0.976947	SB-100	0.00364775
	Kontrol	GJ-K-50	0.983405	0.032018	0.00171297	4.1875	0.548807	0.0243736	3.2725	0.295	0.344595
	Kontrol	KM-K-50	1.66525	0.0990956	0.00240984	5.3375	0.645261	0.0395173	2.53	0.93	0.385548
	Kontrol	BSM-K-50	1.51712	0.0846531	0.00224505	5.7	1.22399	0.00657701	1.9025	0.91125	0.385548
	Kontrol	CH-K-50	1.28926	0.0606974	0.00196175	9.25	0.39133	0.0264186	3.9875	0.4325	2.02369
	Kontrol	SB-K-50	1.93195	0.172905	0.0029844	5.3875	0.584239	0.0307848	4.7175	1.0075	0.736579
	Kontrol	GJ-K-50	0.999504	0.0337927	0.0015261	4.01875	0.822423	0.0364223	3.9525	0.56625	1.43279
	Kontrol	KM-K-50	1.6058	0.0910411	0.0023573	4.2625	1.27714	0.0371408	3.805	0.55625	0.4031
	Kontrol	BSM-K-50	1.41415	0.0729341	0.00231421	4.55	0.946436	0.00348195	1.62	0.86875	0.321193
	Kontrol	CH-K-50	1.46308	0.081115	0.00275765	4.6375	0.371645	0.010059	2.8025	0.87125	1.74287
	Kontrol	SB-K-50	2.4307	0.217744	0.00334024	4.325	0.714158	0.0365328	4.31	0.51375	1.35673
	Kontrol	GJ-K-50	0.991454	0.0329003	0.00162087	3.85	0.685615	0.00403464	3.6125	0.430625	0.888692
	Kontrol	KM-K-50	1.63553	0.0950266	0.00238376	3.1875	0.961199	0.0104735	3.1675	0.743125	0.394324
	Kontrol	BSM-K-50	1.43918	0.0790186	0.00235147	5.125	1.08521	0.00502948	1.76125	0.89	0.353371
	Kontrol	CH-K-50	1.37617	0.0705428	0.00235589	6.94375	0.381488	0.00287399	3.395	0.651875	1.88328
	Kontrol	SB-K-50	2.18133	0.195314	0.00318241	4.85625	0.649198	0.0024871	4.51375	0.760625	1.04666
	Kontrol	GJ-K-100	0.905357	0.0253864	0.00129497	2.4875	0.788959	0.0417833	3.515	0.7225	0.239286
	Kontrol	KM-K-100	1.0414	0.0348298	0.00148288	3.1375	0.560618	0.0365881	2.67	0.3625	0.332894
	Kontrol	BSM-K-100	1.13799	0.0444975	0.00146655	2.7625	0.556681	0.026087	2.845	0.78	0.198332
	Kontrol	CH-K-100	1.12339	0.043243	0.00145195	3.5125	0.446447	0.0438836	3.4075	0.7275	1.27483
	Kontrol	SB-K-100	1.35088	0.0616865	0.00174001	5.55	0.536996	0.00364775	4.0775	0.87	1.09931
	Kontrol	GJ-K-100	1.0218	0.0345151	0.00160709	3.075	1.41887	0.0103353	2.7225	0.83125	0.414801
	Kontrol	KM-K-100	1.54805	0.084173	0.00207282	4.175	0.664946	0.025479	2.0125	0.70125	0.151528
	Kontrol	BSM-K-100	1.26901	0.0529798	0.0014349	2.1	0.67282	0.0270818	1.79	0.79375	0.438203
	Kontrol	CH-K-100	1.48103	0.0735068	0.00173629	4.475	0.348024	0.0248158	2.555	0.8375	0.742429
	Kontrol	SB-K-100	2.27835	0.176629	0.00286902	4.675	0.527154	0.00585851	4.08	0.55375	1.05836
	Kontrol	GJ-K-100	0.963578	0.0297837	0.00145033	2.78125	1.10391	0.0260593	3.11875	0.776875	0.327043
	Kontrol	KM-K-100	1.29473	0.0568506	0.00178367	3.65625	0.612782	0.0310335	2.34125	0.531875	0.242211
	Kontrol	BSM-K-100	1.2035	0.048652	0.00144935	2.43125	0.61475	0.0265844	2.3175	0.786875	0.318268
	Kontrol	CH-K-100	1.30221	0.057379	0.00159346	3.99375	0.397235	0.0343497	2.98125	0.7825	1.00863
	Kontrol	SB-K-100	1.81462	0.11177	0.00230462	5.1125	0.532075	0.00475313	4.07875	0.711875	1.07883
	Stress	GJ-S-0	0.361523	0.00468273	0.000592974	3.7875	0.767306	0.0171887	2.5325	0.43375	0.52011
	Stress	KM-S-0	0.598903	0.0124611	0.000955142	3.45	0.747621	0.0333825	1.88	0.42625	0.830187
	Stress	BSM-S-0	0.281104	0.00308197	0.000395838	2.225	0.87754	0.0040899	1.5175	0.8275	0.139827
	Stress	CH-S-0	0.423025	0.00596681	0.000643248	8.8125	0.546838	0.023213	1.9025	0.60125	1.77212
	Stress	SB-S-0	0.239195	0.00182452	0.000359002	7.13125	0.867698	0.00259764	3.09	0.5675	8.59966
	Stress	GJ-S-0	0.417702	0.00587525	0.000671787	2.65	0.680694	0.0242631	3.5925	0.5225	0.397249
	Stress	KM-S-0	0.323309	0.00314618	0.000449288	3.9375	0.536996	0.0454864	1.2575	0.535	0.227585
	Stress	BSM-S-0	0.184024	0.00150469	0.000413381	1.5	1.598	0.0118276	2.1675	0.7775	0.29194
	Stress	CH-S-0	0.687591	0.016195	0.00109142	4.75	0.4681	0.00403464	1.825	0.9025	1.64926
	Stress	SB-S-0	0.229744	0.00208138	0.000444872	7.175	0.810612	0.00397937	3.7975	0.90375	3.3342
	Stress	GJ-S-0	0.389612	0.00526336	0.000632794	3.21875	0.724	0.0207259	3.0625	0.478125	0.166154
	Stress	KM-S-0	0.461106	0.00704055	0.000702343	3.69375	0.642309	0.0394344	1.56875	0.480625	0.528886
	Stress	BSM-S-0	0.232564	0.00222568	0.000400246	2.95	1.23777	0.00795873	1.8425	0.8025	0.215884
	Stress	CH-S-0	0.555308	0.010456	0.000867245	6.78125	0.507469	0.0136238	1.86375	0.751875	1.71069
	Stress	SB-S-0	0.23447	0.00195633	0.000401035	7.0875	0.839155	0.0032885	3.44375	0.735625	5.96693
	Stress	GJ-S-50	0.272583	0.00266874	0.000576467	6.0125	0.590145	0.0755527	2.505	0.89875	0.941346
	Stress	KM-S-50	0.265689	0.00226961	0.000428706	3.3	0.556681	0.0526713	1.605	0.6475	0.210033
	Stress	BSM-S-50	0.392339	0.00553015	0.000530791	8.0875	0.794864	0.00171334	2.5225	0.92	0.245136
	Stress	CH-S-50	0.789619	0.0210686	0.0012349	6.1125	0.59605	0.0208917	1.44	0.72625	2.7199
	Stress	SB-S-50	0.305525	0.0136827	0.0039921	7.71875	0.574397	0.010059	2.355	0.88125	2.37472
	Stress	GJ-S-50	0.256173	0.00241002	0.000563688	6.075	0.722031	0.0664609	3.005	0.885	0.806785
	Stress	KM-S-50	0.190284	0.00141974	0.000327358	4.7125	0.507469	0.0668202	2.16	0.37625	0.473306
	Stress	BSM-S-50	0.274398	0.00262451	0.000406626	5.675	0.920846	0.0213338	3.2025	0.83125	0.52011
	Stress	CH-S-50	0.504833	0.00974532	0.000935174	7.725	0.509438	0.0281319	1.88	0.6275	4.4926
	Stress	SB-S-50	0.570615	0.024881	0.00290662	7.025	0.682662	0.00425571	2.1975	0.6975	1.0291
	Stress	GJ-S-50	0.264378	0.00253781	0.000570022	6.04375	0.656088	0.0573692	2.755	0.891875	0.874066
	Stress	KM-S-50	0.227987	0.00182429	0.000380502	4.00625	0.532075	0.0597458	1.8825	0.511875	0.34167
	Stress	BSM-S-50	0.333368	0.00394374	0.000469128	6.88125	0.857855	0.067594	2.8625	0.875625	0.382623
	Stress	CH-S-50	0.647226	0.0148817	0.00108356	6.91875	0.552744	0.0245118	1.66	0.676875	3.60625
	Stress	SB-S-50	0.58907	0.0121879	0.00102217	8.4125	0.62853	0.00715733	2.27625	0.789375	1.70191
	Stress	GJ-S-100	0.389205	0.00526516	0.000778961	6.8875	0.973994	0.0228261	3.1225	0.8025	1.71946
	Stress	KM-S-100	0.894181	0.0336795	0.00189661	7.4125	1.10194	0.0310059	2.7	0.65125	1.0174
	Stress	BSM-S-100	0.845303	0.0395175	0.00162267	5.65	2.02712	0.00591378	2.1325	0.38	14.456
	Stress	CH-S-100	0.69241	0.0157606	0.00125689	7.8125	0.714158	0.0313375	1.7525	0.79375	4.36974
	Stress	SB-S-100	1.33036	0.0695819	0.0023808	8.1125	1.06848	0.00607959	1.62	0.9375	4.93724
	Stress	GJ-S-100	0.517108	0.00998428	0.000998465	8.275	0.973994	0.0139278	1.625	0.85125	2.28111
	Stress	KM-S-100	0.588463	0.0153749	0.0012515	6.6	1.39328	0.0332719	2.5325	0.53375	2.65554
	Stress	BSM-S-100	0.838894	0.0342114	0.00166061	8.325	2.48971	0.00442152	3.93	0.86	11.9637
	Stress	CH-S-100	0.281524	0.00891627	0.00511019	9.1125	0.785022	0.0876013	3.0425	0.93125	7.73963
	Stress	SB-S-100	0.235341	0.00623087	0.00417764	12.5375	0.885414	0.0200626	1.8375	0.2	6.96152
	Stress	GJ-S-100	0.145937	0.00239599	0.00283119	7.58125	0.973994	0.00323324	2.37375	0.826875	2.00029
	Stress	KM-S-100	0.283521	0.00904324	0.00421718	7.00625	1.24761	0.00563744	2.61625	0.5925	1.83647
	Stress	BSM-S-100	0.389027	0.0170259	0.00366976	6.9875	2.25842	0.00516765	3.03125	0.62	13.2099
	Stress	CH-S-100	0.241926	0.00658442	0.00475872	8.4625	0.74959	0.0024871	2.3975	0.8625	6.05469
	Stress	SB-S-100	0.350129	0.0137914	0.00558866	10.325	0.976947	0.00262528	1.72875	0.56875	5.94938
[truncated: 26 more columns]

## Sheet: Visual Data
	FTSW	CODE	Physiological Changes												CHL A									CHL B									CAR									ANTH
			CHL A	CHL B	CAR	ANTH	PRO	SOD	APX	CAT	H2O2				FTSW 1	FTSW 1	FTSW 1	Ave	FTSW 0.2	FTSW 0.2	FTSW 0.2	Ave		FTSW 1	FTSW 1	FTSW 1		FTSW 0.2	FTSW 0.2	FTSW 0.2			FTSW 1	FTSW 1	FTSW 1		FTSW 0.2	FTSW 0.2	FTSW 0.2			FTSW 1	FTSW 1	FTSW 1		FTSW 0.2	FTSW 0.2	FTSW 0.2
	Kontrol	GJ-K-0	0.990925	0.0336122	0.00148254	3.3375	0.479911	0.00265291	2.6375	0.7875	0.362146			GJ-0	0.990925	1.24303	1.11698	1.11698	0.361523	0.417702	0.389612	0.389612	GJ-0	0.0336122	0.0540907	0.0432467	0.0436499	0.00468273	0.00587525	0.00526336	0.00527378	GJ-0	0.00148254	0.00182679	0.00165503	0.00165479	0.000592974	0.000671787	0.000632794	0.000632519	GJ-0	3.3375	3.45	3.39375	3.39375	3.7875	2.65	3.21875	3.21875
	Kontrol	KM-K-0	1.6067	0.0978868	0.00225157	2.75	0.554712	0.0153095	1.4225	0.6325	0.426502			KM-0	1.6067	1.89103	1.74886	1.74886	0.598903	0.323309	0.461106	0.461106	KM-0	0.0978868	0.15558	0.125216	0.126228	0.0124611	0.00314618	0.00704055	0.00754927	KM-0	0.00225157	0.00283895	0.0025512	0.00254724	0.000955142	0.000449288	0.000702343	0.000702258	KM-0	2.75	2.75	2.75	2.75	3.45	3.9375	3.69375	3.69375
	Kontrol	BSM-K-0	1.19492	0.0495428	0.00176693	2.1	1.33619	0.0588062	1.54	0.4675	0.256837			BSM-0	1.19492	1.30158	1.24825	1.24825	0.281104	0.184024	0.232564	0.232564	BSM-0	0.0495428	0.0572037	0.0533069	0.0533511	0.00308197	0.00150469	0.00222568	0.00227078	BSM-0	0.00176693	0.00176479	0.00176515	0.00176562	0.000395838	0.000413381	0.000400246	0.000403155	BSM-0	2.1	3.95	3.025	3.025	2.225	1.5	2.95	2.225
	Kontrol	CH-K-0	1.66795	0.105934	0.00226116	2.3625	0.501564	0.0146463	2.6025	0.81375	5.5574			CH-0	1.66795	1.48129	1.57462	1.57462	0.423025	0.687591	0.555308	0.555308	CH-0	0.105934	0.0796167	0.0923197	0.0926234	0.00596681	0.016195	0.010456	0.0108726	CH-0	0.00226116	0.00187129	0.00206567	0.00206604	0.000643248	0.00109142	0.000867245	0.000867303	CH-0	2.3625	3.5625	2.9625	2.9625	8.8125	4.75	6.78125	6.78125
	Kontrol	SB-K-0	1.41986	0.0754826	0.00198836	3.175	0.857855	0.0221629	2.4625	0.4525	1.94178			SB-0	1.41986	1.78141	1.60063	1.60063	0.239195	0.229744	0.23447	0.23447	SB-0	0.0754826	0.134258	0.102863	0.104201	0.00182452	0.00208138	0.00195633	0.00195407	SB-0	0.00198836	0.00241797	0.00221339	0.00220657	0.000359002	0.000444872	0.000401035	0.000401636	SB-0	3.175	6.1125	4.64375	4.64375	7.13125	7.175	7.0875	7.13125
	Kontrol	GJ-K-0	1.24303	0.0540907	0.00182679	3.45	0.905098	0.00198968	2.5575	0.74875	0.490857			GJ-50	0.983405	0.999504	0.991454	0.991454	0.272583	0.256173	0.264378	0.264378	GJ-50	0.032018	0.0337927	0.0329003	0.0329037	0.00266874	0.00241002	0.00253781	0.00253886	GJ-50	0.00171297	0.0015261	0.00162087	0.00161998	0.000576467	0.000563688	0.000570022	0.000570059	GJ-50	4.1875	4.01875	3.85	4.01875	6.0125	6.075	6.04375	6.04375
	Kontrol	KM-K-0	1.89103	0.15558	0.00283895	2.75	0.643293	0.0357038	1.9125	0.925	0.806785			KM-50	1.66525	1.6058	1.63553	1.63553	0.265689	0.190284	0.227987	0.227987	KM-50	0.0990956	0.0910411	0.0950266	0.0950544	0.00226961	0.00141974	0.00182429	0.00183788	KM-50	0.00240984	0.0023573	0.00238376	0.00238363	0.000428706	0.000327358	0.000380502	0.000378855	KM-50	5.3375	4.2625	3.1875	4.2625	3.3	4.7125	4.00625	4.00625
	Kontrol	BSM-K-0	1.30158	0.0572037	0.00176479	3.95	1.83027	0.0739499	1.47	0.78375	0.672223			BSM-50	1.51712	1.41415	1.43918	1.45682	0.392339	0.274398	0.333368	0.333368	BSM-50	0.0846531	0.0729341	0.0790186	0.0788686	0.00553015	0.00262451	0.00394374	0.0040328	BSM-50	0.00224505	0.00231421	0.00235147	0.00230358	0.000530791	0.000406626	0.000469128	0.000468848	BSM-50	5.7	4.55	5.125	5.125	8.0875	5.675	6.88125	6.88125
	Kontrol	CH-K-0	1.48129	0.0796167	0.00187129	3.5625	0.300781	0.00878777	2.525	0.6725	1.91253			CH-50	1.28926	1.46308	1.37617	1.37617	0.789619	0.504833	0.647226	0.647226	CH-50	0.0606974	0.081115	0.0705428	0.0707851	0.0210686	0.00974532	0.0148817	0.0152318	CH-50	0.00196175	0.00275765	0.00235589	0.00235843	0.0012349	0.000935174	0.00108356	0.00108455	CH-50	9.25	4.6375	6.94375	6.94375	6.1125	7.725	6.91875	6.91875
	Kontrol	SB-K-0	1.78141	0.134258	0.00241797	6.1125	0.662978	0.026916	2.1675	0.49	1.25142			SB-50	1.93195	2.4307	2.18133	2.18133	0.305525	0.570615	0.58907	0.488403	SB-50	0.172905	0.217744	0.195314	0.195321	0.0136827	0.024881	0.0121879	0.0169172	SB-50	0.0029844	0.00334024	0.00318241	0.00316901	0.0039921	0.00290662	0.00102217	0.0026403	SB-50	5.3875	4.325	4.85625	4.85625	7.71875	7.025	8.4125	7.71875
	Kontrol	GJ-K-0	1.11698	0.0432467	0.00165503	3.39375	0.692505	0.0023213	2.5975	0.768125	0.426502			GJ-100	0.905357	1.0218	0.963578	0.963578	0.389205	0.517108	0.145937	0.35075	GJ-100	0.0253864	0.0345151	0.0297837	0.0298951	0.00526516	0.00998428	0.00239599	0.00588181	GJ-100	0.00129497	0.00160709	0.00145033	0.0014508	0.000778961	0.000998465	0.00283119	0.0015362	GJ-100	2.4875	3.075	2.78125	2.78125	6.8875	8.275	7.58125	7.58125
	Kontrol	KM-K-0	1.74886	0.125216	0.0025512	2.75	0.599003	0.0255066	1.6675	0.77875	0.616643			KM-100	1.0414	1.54805	1.29473	1.29473	0.894181	0.588463	0.283521	0.588722	KM-100	0.0348298	0.084173	0.0568506	0.0586178	0.0336795	0.0153749	0.00904324	0.0193659	KM-100	0.00148288	0.00207282	0.00178367	0.00177979	0.00189661	0.0012515	0.00421718	0.00245509	KM-100	3.1375	4.175	3.65625	3.65625	7.4125	6.6	7.00625	7.00625
	Kontrol	BSM-K-0	1.24825	0.0533069	0.00176515	3.025	1.58323	0.0719049	1.505	0.625625	0.46453			BSM-100	1.13799	1.26901	1.2035	1.2035	0.845303	0.838894	0.389027	0.691075	BSM-100	0.0444975	0.0529798	0.048652	0.0487098	0.0395175	0.0342114	0.0170259	0.0302516	BSM-100	0.00146655	0.0014349	0.00144935	0.00145027	0.00162267	0.00166061	0.00366976	0.00231768	BSM-100	2.7625	2.1	2.43125	2.43125	5.65	8.325	6.9875	6.9875
	Kontrol	CH-K-0	1.57462	0.0923197	0.00206567	2.9625	0.401172	0.011717	2.56375	0.743125	3.73496			CH-100	1.12339	1.48103	1.30221	1.30221	0.69241	0.281524	0.241926	0.405287	CH-100	0.043243	0.0735068	0.057379	0.0580429	0.0157606	0.00891627	0.00658442	0.0104204	CH-100	0.00145195	0.00173629	0.00159346	0.0015939	0.00125689	0.00511019	0.00475872	0.0037086	CH-100	3.5125	4.475	3.99375	3.99375	7.8125	9.1125	8.4625	8.4625
	Kontrol	SB-K-0	1.60063	0.102863	0.00221339	4.64375	0.760416	0.0245394	2.315	0.47125	1.5966			SB-100	1.35088	2.27835	1.81462	1.81462	1.33036	0.235341	0.350129	0.63861	SB-100	0.0616865	0.176629	0.11177	0.116695	0.0695819	0.00623087	0.0137914	0.029868	SB-100	0.00174001	0.00286902	0.00230462	0.00230455	0.0023808	0.00417764	0.00558866	0.00404903	SB-100	5.55	4.675	5.1125	5.1125	8.1125	12.5375	10.325	10.325
	Kontrol	GJ-K-50	0.983405	0.032018	0.00171297	4.1875	0.548807	0.0243736	3.2725	0.295	0.344595				Chl A		CHL B		CAR		ANTH		PRO		SOD		APX		CAT		H2O2
	Kontrol	KM-K-50	1.66525	0.0990956	0.00240984	5.3375	0.645261	0.0395173	2.53	0.93	0.385548		Treatments and Cultivars
	Kontrol	BSM-K-50	1.51712	0.0846531	0.00224505	5.7	1.22399	0.00657701	1.9025	0.91125	0.385548				FTSW 1	FTSW 0.2	FTSW 1	FTSW 0.2	FTSW 1	FTSW 0.2	FTSW 1	FTSW 0.2	FTSW 1	FTSW 0.2	FTSW 1	FTSW 0.2	FTSW 1	FTSW 0.2	FTSW 1	FTSW 0.2	FTSW 1	FTSW 0.2			CHLA	CHLB	CAR	ANTH	PRO	SOD	APX	CAT	H2O2
	Kontrol	CH-K-50	1.28926	0.0606974	0.00196175	9.25	0.39133	0.0264186	3.9875	0.4325	2.02369		Low	GJ	1.11698	0.389612	0.0436499	0.00527378	0.00165479	0.000632519	3.39375	3.21875	0.692505	0.724	0.0023213	0.0207259	2.5975	3.0625	0.768125	0.478125	0.426502	0.361171		GJ-K-0	1.11698	0.0436499	0.00165479	3.39375	0.692505	0.0023213	2.5975	0.768125	0.426502
	Kontrol	SB-K-50	1.93195	0.172905	0.0029844	5.3875	0.584239	0.0307848	4.7175	1.0075	0.736579			KM	1.74886	0.461106	0.126228	0.00754927	0.00254724	0.000702258	2.75	3.69375	0.599003	0.642309	0.0255066	0.0394344	1.6675	1.56875	0.77875	0.480625	0.586258	0.528886		KM-K-0	1.74886	0.126228	0.00254724	2.75	0.599003	0.0255066	1.6675	0.77875	0.586258
	Kontrol	GJ-K-50	0.999504	0.0337927	0.0015261	4.01875	0.822423	0.0364223	3.9525	0.56625	1.43279			BSM	1.24825	0.232564	0.0533511	0.00227078	0.00176562	0.000403155	3.025	2.225	1.58323	1.23777	0.0682203	0.00795873	1.505	1.8425	0.625625	0.8025	0.506249	0.215884		BSM-K-0	1.24825	0.0533511	0.00176562	3.025	1.58323	0.0682203	1.505	0.625625	0.506249
	Kontrol	KM-K-50	1.6058	0.0910411	0.0023573	4.2625	1.27714	0.0371408	3.805	0.55625	0.4031			CH	1.57462	0.555308	0.0926234	0.0108726	0.00206604	0.000867303	2.9625	6.78125	0.401172	0.507469	0.011717	0.0136238	2.56375	1.86375	0.743125	0.751875	0.635018	1.71069		CH-K-0	1.57462	0.0926234	0.00206604	2.9625	0.401172	0.011717	2.56375	0.743125	0.635018
	Kontrol	BSM-K-50	1.41415	0.0729341	0.00231421	4.55	0.946436	0.00348195	1.62	0.86875	0.321193			SB	1.60063	0.23447	0.104201	0.00195407	0.00220657	0.000401636	4.64375	7.13125	0.760416	0.839155	0.0245394	0.0032885	2.315	3.44375	0.47125	0.735625	0.625027	5.96693		SB-K-0	1.60063	0.104201	0.00220657	4.64375	0.760416	0.0245394	2.315	0.47125	0.625027
	Kontrol	CH-K-50	1.46308	0.081115	0.00275765	4.6375	0.371645	0.010059	2.8025	0.87125	1.74287		Mod	GJ	0.991454	0.264378	0.0329037	0.00253886	0.00161998	0.000570059	4.01875	6.04375	0.685615	0.656088	0.0216102	0.0664609	3.6125	2.755	0.430625	0.891875	0.888692	0.874066		GJ-K-50	0.991454	0.0329037	0.00161998	4.01875	0.685615	0.0216102	3.6125	0.430625	0.888692
	Kontrol	SB-K-50	2.4307	0.217744	0.00334024	4.325	0.714158	0.0365328	4.31	0.51375	1.35673			KM	1.63553	0.227987	0.0950544	0.00183788	0.00238363	0.000378855	4.2625	4.00625	0.961199	0.532075	0.0290438	0.0597458	3.1675	1.8825	0.743125	0.511875	0.394324	0.34167		KM-K-50	1.63553	0.0950544	0.00238363	4.2625	0.961199	0.0290438	3.1675	0.743125	0.394324
	Kontrol	GJ-K-50	0.991454	0.0329003	0.00162087	3.85	0.685615	0.00403464	3.6125	0.430625	0.888692			BSM	1.45682	0.333368	0.0788686	0.0040328	0.00230358	0.000468848	5.125	6.88125	1.08521	0.857855	0.00502948	0.0302137	1.76125	2.8625	0.89	0.875625	0.353371	0.382623		BSM-K-50	1.45682	0.0788686	0.00230358	5.125	1.08521	0.00502948	1.76125	0.89	0.353371
	Kontrol	KM-K-50	1.63553	0.0950266	0.00238376	3.1875	0.961199	0.0104735	3.1675	0.743125	0.394324			CH	1.37617	0.647226	0.0707851	0.0152318	0.00235843	0.00108455	6.94375	6.91875	0.381488	0.552744	0.0131172	0.0245118	3.395	1.66	0.651875	0.676875	1.88328	3.60625		CH-K-50	1.37617	0.0707851	0.00235843	6.94375	0.381488	0.0131172	3.395	0.651875	1.88328
	Kontrol	BSM-K-50	1.43918	0.0790186	0.00235147	5.125	1.08521	0.00502948	1.76125	0.89	0.353371			SB	2.18133	0.488403	0.195321	0.0169172	0.00316901	0.0026403	4.85625	7.71875	0.649198	0.62853	0.0232682	0.00715733	4.51375	2.27625	0.760625	0.789375	1.04666	1.70191		SB-K-5	2.18133	0.195321	0.00316901	4.85625	0.649198	0.0232682	4.51375	0.760625	1.04666
	Kontrol	CH-K-50	1.37617	0.0705428	0.00235589	6.94375	0.381488	0.00287399	3.395	0.651875	1.88328		High	GJ	0.963578	0.35075	0.0298951	0.00588181	0.0014508	0.0015362	2.78125	7.58125	1.10391	0.973994	0.0260593	0.013329	3.11875	2.37375	0.776875	0.826875	0.327043	2.00029		GJ-K-100	0.963578	0.0298951	0.0014508	2.78125	1.10391	0.0260593	3.11875	0.776875	0.327043
	Kontrol	SB-K-50	2.18133	0.195314	0.00318241	4.85625	0.649198	0.0024871	4.51375	0.760625	1.04666			KM	1.29473	0.588722	0.0586178	0.0193659	0.00177979	0.00245509	3.65625	7.00625	0.612782	1.24761	0.0310335	0.0233051	2.34125	2.61625	0.531875	0.5925	0.242211	1.83647		KM-K-100	1.29473	0.0586178	0.00177979	3.65625	0.612782	0.0310335	2.34125	0.531875	0.242211
	Kontrol	GJ-K-100	0.905357	0.0253864	0.00129497	2.4875	0.788959	0.0417833	3.515	0.7225	0.239286			BSM	1.2035	0.691075	0.0487098	0.0302516	0.00145027	0.00231768	2.43125	6.9875	0.61475	2.25842	0.0265844	0.00516765	2.3175	3.03125	0.786875	0.62	0.318268	13.2099		BSM-K-100	1.2035	0.0487098	0.00145027	2.43125	0.61475	0.0265844	2.3175	0.786875	0.318268
	Kontrol	KM-K-100	1.0414	0.0348298	0.00148288	3.1375	0.560618	0.0365881	2.67	0.3625	0.332894			CH	1.30221	0.405287	0.0580429	0.0104204	0.0015939	0.0037086	3.99375	8.4625	0.397235	0.74959	0.0343497	0.0404753	2.98125	2.3975	0.7825	0.8625	1.00863	6.05469		CH-K-100	1.30221	0.0580429	0.0015939	3.99375	0.397235	0.0343497	2.98125	0.7825	1.00863
	Kontrol	BSM-K-100	1.13799	0.0444975	0.00146655	2.7625	0.556681	0.026087	2.845	0.78	0.198332			SB	1.81462	0.63861	0.116695	0.029868	0.00230455	0.00404903	5.1125	10.325	0.532075	0.976947	0.00475313	0.00958917	4.07875	1.72875	0.711875	0.56875	1.07883	5.94938		SB-K-100	1.81462	0.116695	0.00230455	5.1125	0.532075	0.00475313	4.07875	0.711875	1.07883
	Kontrol	CH-K-100	1.12339	0.043243	0.00145195	3.5125	0.446447	0.0438836	3.4075	0.7275	1.27483																							GJ-S-0	0.389612	0.00527378	0.000632519	3.21875	0.724	0.0207259	3.0625	0.478125	0.361171
	Kontrol	SB-K-100	1.35088	0.0616865	0.00174001	5.55	0.536996	0.00364775	4.0775	0.87	1.09931																							KM-S-0	0.461106	0.00754927	0.000702258	3.69375	0.642309	0.0394344	1.56875	0.480625	0.528886
	Kontrol	GJ-K-100	1.0218	0.0345151	0.00160709	3.075	1.41887	0.0103353	2.7225	0.83125	0.414801																							BSM-S-0	0.232564	0.00227078	0.000403155	2.225	1.23777	0.00795873	1.8425	0.8025	0.215884
	Kontrol	KM-K-100	1.54805	0.084173	0.00207282	4.175	0.664946	0.025479	2.0125	0.70125	0.151528																							CH-S-0	0.555308	0.0108726	0.000867303	6.78125	0.507469	0.0136238	1.86375	0.751875	1.71069
	Kontrol	BSM-K-100	1.26901	0.0529798	0.0014349	2.1	0.67282	0.0270818	1.79	0.79375	0.438203																							SB-S-0	0.23447	0.00195407	0.000401636	7.13125	0.839155	0.0032885	3.44375	0.735625	5.96693
	Kontrol	CH-K-100	1.48103	0.0735068	0.00173629	4.475	0.348024	0.0248158	2.555	0.8375	0.742429																							GJ-S-50	0.264378	0.00253886	0.000570059	6.04375	0.656088	0.0664609	2.755	0.891875	0.874066
	Kontrol	SB-K-100	2.27835	0.176629	0.00286902	4.675	0.527154	0.00585851	4.08	0.55375	1.05836																							KM-S-50	0.227987	0.00183788	0.000378855	4.00625	0.532075	0.0597458	1.8825	0.511875	0.34167
	Kontrol	GJ-K-100	0.963578	0.0297837	0.00145033	2.78125	1.10391	0.0260593	3.11875	0.776875	0.327043																							BSM-S-50	0.333368	0.0040328	0.000468848	6.88125	0.857855	0.0302137	2.8625	0.875625	0.382623
	Kontrol	KM-K-100	1.29473	0.0568506	0.00178367	3.65625	0.612782	0.0310335	2.34125	0.531875	0.242211																							CH-S-50	0.647226	0.0152318	0.00108455	6.91875	0.552744	0.0245118	1.66	0.676875	3.60625
	Kontrol	BSM-K-100	1.2035	0.048652	0.00144935	2.43125	0.61475	0.0265844	2.3175	0.786875	0.318268																							SB-S-50	0.488403	0.0169172	0.0026403	7.71875	0.62853	0.00715733	2.27625	0.789375	1.70191
	Kontrol	CH-K-100	1.30221	0.057379	0.00159346	3.99375	0.397235	0.0343497	2.98125	0.7825	1.00863																							GJ-S-100	0.35075	0.00588181	0.0015362	7.58125	0.973994	0.013329	2.37375	0.826875	2.00029
	Kontrol	SB-K-100	1.81462	0.11177	0.00230462	5.1125	0.532075	0.00475313	4.07875	0.711875	1.07883																							KM-S-100	0.588722	0.0193659	0.00245509	7.00625	1.24761	0.0233051	2.61625	0.5925	1.83647
	Stress	GJ-S-0	0.361523	0.00468273	0.000592974	3.7875	0.767306	0.0171887	2.5325	0.43375	0.52011																							BSM-S-100	0.691075	0.0302516	0.00231768	6.9875	2.25842	0.00516765	3.03125	0.62	13.2099
	Stress	KM-S-0	0.598903	0.0124611	0.000955142	3.45	0.747621	0.0333825	1.88	0.42625	0.830187																							CH-S-100	0.405287	0.0104204	0.0037086	8.4625	0.74959	0.0404753	2.3975	0.8625	6.05469
	Stress	BSM-S-0	0.281104	0.00308197	0.000395838	2.225	0.87754	0.0040899	1.5175	0.8275	0.139827																							SB-S-100	0.63861	0.029868	0.00404903	10.325	0.976947	0.00958917	1.72875	0.56875	5.94938
	Stress	CH-S-0	0.423025	0.00596681	0.000643248	8.8125	0.546838	0.023213	1.9025	0.60125	1.77212
	Stress	SB-S-0	0.239195	0.00182452	0.000359002	7.13125	0.867698	0.00259764	3.09	0.5675	8.59966
	Stress	GJ-S-0	0.417702	0.00587525	0.000671787	2.65	0.680694	0.0242631	3.5925	0.5225	0.397249
	Stress	KM-S-0	0.323309	0.00314618	0.000449288	3.9375	0.536996	0.0454864	1.2575	0.535	0.227585
	Stress	BSM-S-0	0.184024	0.00150469	0.000413381	1.5	1.598	0.0118276	2.1675	0.7775	0.29194
	Stress	CH-S-0	0.687591	0.016195	0.00109142	4.75	0.4681	0.00403464	1.825	0.9025	1.64926
	Stress	SB-S-0	0.229744	0.00208138	0.000444872	7.175	0.810612	0.00397937	3.7975	0.90375	3.3342
	Stress	GJ-S-0	0.389612	0.00526336	0.000632794	3.21875	0.724	0.0207259	3.0625	0.478125	0.166154
	Stress	KM-S-0	0.461106	0.00704055	0.000702343	3.69375	0.642309	0.0394344	1.56875	0.480625	0.528886
	Stress	BSM-S-0	0.232564	0.00222568	0.000400246	2.95	1.23777	0.00795873	1.8425	0.8025	0.215884
	Stress	CH-S-0	0.555308	0.010456	0.000867245	6.78125	0.507469	0.0136238	1.86375	0.751875	1.71069
	Stress	SB-S-0	0.23447	0.00195633	0.000401035	7.0875	0.839155	0.0032885	3.44375	0.735625	5.96693
	Stress	GJ-S-50	0.272583	0.00266874	0.000576467	6.0125	0.590145	0.0755527	2.505	0.89875	0.941346
	Stress	KM-S-50	0.265689	0.00226961	0.000428706	3.3	0.556681	0.0526713	1.605	0.6475	0.210033
	Stress	BSM-S-50	0.392339	0.00553015	0.000530791	8.0875	0.794864	0.00171334	2.5225	0.92	0.245136
	Stress	CH-S-50	0.789619	0.0210686	0.0012349	6.1125	0.59605	0.0208917	1.44	0.72625	2.7199
	Stress	SB-S-50	0.305525	0.0136827	0.0039921	7.71875	0.574397	0.010059	2.355	0.88125	2.37472
	Stress	GJ-S-50	0.256173	0.00241002	0.000563688	6.075	0.722031	0.0664609	3.005	0.885	0.806785
	Stress	KM-S-50	0.190284	0.00141974	0.000327358	4.7125	0.507469	0.0668202	2.16	0.37625	0.473306
	Stress	BSM-S-50	0.274398	0.00262451	0.000406626	5.675	0.920846	0.0213338	3.2025	0.83125	0.52011
	Stress	CH-S-50	0.504833	0.00974532	0.000935174	7.725	0.509438	0.0281319	1.88	0.6275	4.4926
	Stress	SB-S-50	0.570615	0.024881	0.00290662	7.025	0.682662	0.00425571	2.1975	0.6975	1.0291
	Stress	GJ-S-50	0.264378	0.00253781	0.000570022	6.04375	0.656088	0.0573692	2.755	0.891875	0.874066
	Stress	KM-S-50	0.227987	0.00182429	0.000380502	4.00625	0.532075	0.0597458	1.8825	0.511875	0.34167
	Stress	BSM-S-50	0.333368	0.00394374	0.000469128	6.88125	0.857855	0.067594	2.8625	0.875625	0.382623
	Stress	CH-S-50	0.647226	0.0148817	0.00108356	6.91875	0.552744	0.0245118	1.66	0.676875	3.60625
	Stress	SB-S-50	0.58907	0.0121879	0.00102217	8.4125	0.62853	0.00715733	2.27625	0.789375	1.70191
	Stress	GJ-S-100	0.389205	0.00526516	0.000778961	6.8875	0.973994	0.0228261	3.1225	0.8025	1.71946
	Stress	KM-S-100	0.894181	0.0336795	0.00189661	7.4125	1.10194	0.0310059	2.7	0.65125	1.0174
	Stress	BSM-S-100	0.845303	0.0395175	0.00162267	5.65	2.02712	0.00591378	2.1325	0.38	14.456
	Stress	CH-S-100	0.69241	0.0157606	0.00125689	7.8125	0.714158	0.0313375	1.7525	0.79375	4.36974
	Stress	SB-S-100	1.33036	0.0695819	0.0023808	8.1125	1.06848	0.00607959	1.62	0.9375	4.93724
	Stress	GJ-S-100	0.517108	0.00998428	0.000998465	8.275	0.973994	0.0139278	1.625	0.85125	2.28111
	Stress	KM-S-100	0.588463	0.0153749	0.0012515	6.6	1.39328	0.0332719	2.5325	0.53375	2.65554
	Stress	BSM-S-100	0.838894	0.0342114	0.00166061	8.325	2.48971	0.00442152	3.93	0.86	11.9637
	Stress	CH-S-100	0.281524	0.00891627	0.00511019	9.1125	0.785022	0.0876013	3.0425	0.93125	7.73963
	Stress	SB-S-100	0.235341	0.00623087	0.00417764	12.5375	0.885414	0.0200626	1.8375	0.2	6.96152
	Stress	GJ-S-100	0.145937	0.00239599	0.00283119	7.58125	0.973994	0.00323324	2.37375	0.826875	2.00029
	Stress	KM-S-100	0.283521	0.00904324	0.00421718	7.00625	1.24761	0.00563744	2.61625	0.5925	1.83647
	Stress	BSM-S-100	0.389027	0.0170259	0.00366976	6.9875	2.25842	0.00516765	3.03125	0.62	13.2099
	Stress	CH-S-100	0.241926	0.00658442	0.00475872	8.4625	0.74959	0.0024871	2.3975	0.8625	6.05469
	Stress	SB-S-100	0.350129	0.0137914	0.00558866	10.325	0.976947	0.00262528	1.72875	0.56875	5.94938
[truncated: 45 more columns]

## Sheet: Multiple Variable
Code	CHLA	CHLB	CAR	ANTH	PRO	SOD	APX	CAT	H2O2	OsWRKY45	OsNAC6	OsDREB1A	OsDREB2A	OsP5CS1	OsP5CR	OsProDH
GJ-K-0	1.11698	0.0436499	0.00165479	3.39375	0.692505	0.0023213	2.5975	0.768125	0.426502	1	1	1	1	1	1	1
KM-K-0	1.74886	0.126228	0.00254724	2.75	0.599003	0.0255066	1.6675	0.77875	0.586258	1	1	1	1	1	1	1
BSM-K-0	1.24825	0.0533511	0.00176562	3.025	1.58323	0.0682203	1.505	0.625625	0.506249	1	1	1	1	1	1	1
CH-K-0	1.57462	0.0926234	0.00206604	2.9625	0.401172	0.011717	2.56375	0.743125	0.635018
SB-K-0	1.60063	0.104201	0.00220657	4.64375	0.760416	0.0245394	2.315	0.47125	0.625027
GJ-K-50	0.991454	0.0329037	0.00161998	4.01875	0.685615	0.0216102	3.6125	0.430625	0.888692	-4.7231	-9.32564	-3.0543	-10.7947	-11.5352	-5.83641	-3.62149
KM-K-50	1.63553	0.0950544	0.00238363	4.2625	0.961199	0.0290438	3.1675	0.743125	0.394324	2.22387	8.56829	3.17004	1.47371	1.10844	1.54951	2.41456
BSM-K-50	1.45682	0.0788686	0.00230358	5.125	1.08521	0.00502948	1.76125	0.89	0.353371	-1.72658	-8.5005	-1.79358	-3.1155	-1.35271	-1.84511	-2.0927
CH-K-50	1.37617	0.0707851	0.00235843	6.94375	0.381488	0.0131172	3.395	0.651875	1.88328
SB-K-5	2.18133	0.195321	0.00316901	4.85625	0.649198	0.0232682	4.51375	0.760625	1.04666
GJ-K-100	0.963578	0.0298951	0.0014508	2.78125	1.10391	0.0260593	3.11875	0.776875	0.327043	-2.65415	-28.2775	-1.21141	-5.98296	-7.26571	-1.49397	-7.90585
KM-K-100	1.29473	0.0586178	0.00177979	3.65625	0.612782	0.0310335	2.34125	0.531875	0.242211	7.53331	-6.65692	17.9947	1.1056	-1.09938	1.40885	-1.1217
BSM-K-100	1.2035	0.0487098	0.00145027	2.43125	0.61475	0.0265844	2.3175	0.786875	0.318268	-1.60875	0.00444672	-14.3282	-44.281	-14.5049	-42.5952	-28.6482
CH-K-100	1.30221	0.0580429	0.0015939	3.99375	0.397235	0.0343497	2.98125	0.7825	1.00863
SB-K-100	1.81462	0.116695	0.00230455	5.1125	0.532075	0.00475313	4.07875	0.711875	1.07883
GJ-S-0	0.389612	0.00527378	0.000632519	3.21875	0.724	0.0207259	3.0625	0.478125	0.361171	2.15864	-1.72049	1.34285	-1.65795	-1.24792	1.96205	-1.18018
KM-S-0	0.461106	0.00754927	0.000702258	3.69375	0.642309	0.0394344	1.56875	0.480625	0.528886	25.8997	34.7883	15.3463	9.91371	11.294	10.2088	17.8796
BSM-S-0	0.232564	0.00227078	0.000403155	2.225	1.23777	0.00795873	1.8425	0.8025	0.215884	1.40152	-1.58733	1.04124	1.64428	1.7047	1.06043	1.33215
CH-S-0	0.555308	0.0108726	0.000867303	6.78125	0.507469	0.0136238	1.86375	0.751875	1.71069
SB-S-0	0.23447	0.00195407	0.000401636	7.13125	0.839155	0.0032885	3.44375	0.735625	5.96693
GJ-S-50	0.264378	0.00253886	0.000570059	6.04375	0.656088	0.0664609	2.755	0.891875	0.874066	-2.19209	-11.913	-4.52041	35	-5.65262	-2.69087	-3.6066
KM-S-50	0.227987	0.00183788	0.000378855	4.00625	0.532075	0.0597458	1.8825	0.511875	0.34167	15.836	-1.35712	3.91058	8.49596	10.3341	10.078	2.93249
BSM-S-50	0.333368	0.0040328	0.000468848	6.88125	0.857855	0.0302137	2.8625	0.875625	0.382623	-5.81337	0.00871069	53	-6.32007	-2.69617	-7.45382	-11.6614
CH-S-50	0.647226	0.0152318	0.00108455	6.91875	0.552744	0.0245118	1.66	0.676875	3.60625
SB-S-50	0.488403	0.0169172	0.0026403	7.71875	0.62853	0.00715733	2.27625	0.789375	1.70191
GJ-S-100	0.35075	0.00588181	0.0015362	7.58125	0.973994	0.013329	2.37375	0.826875	2.00029	-4.67751	0.00747981	-4.32477	-28.9474	-4.33254	-7.01298	-14.1752
KM-S-100	0.588722	0.0193659	0.00245509	7.00625	1.24761	0.0233051	2.61625	0.5925	1.83647	13.1664	-5.15441	41.2962	22.5622	16.446	6.2823	5.31466
BSM-S-100	0.691075	0.0302516	0.00231768	6.9875	2.25842	0.00516765	3.03125	0.62	13.2099	2.06035	0	0.424062	-12.8812	-4.48916	-12.2381	-22.4516
CH-S-100	0.405287	0.0104204	0.0037086	8.4625	0.74959	0.0404753	2.3975	0.8625	6.05469
SB-S-100	0.63861	0.029868	0.00404903	10.325	0.976947	0.00958917	1.72875	0.56875	5.94938

## Sheet: New Graph
	PCA based on Genes Expressions Analysis									PCA based on Genes Expressions and Biochemistry Analysis											Photosynthetic Pigments analysis																					Enzymatic antioxidants analysis
